# Supplementary material for: Are Environmental Attitudes and Behaviors Comparable Across Countries? A Measurement Invariance Analysis of TIMSS 2023
Source: Research Square preprint supplement (doi:10.21203/rs.3.rs-7087192/v1), 2025-10-01
Supplement: Supplementary file 1 [file b3fbf0f6bfc9cda1e07d27d0.docx]

# Appendix A

*Full Pattern Matrices for 3-Factor and 5-Factor EFA of TIMSS 2023 Environmental Attitudes and Behaviors Items*

## 3-Factor EFA

| **Item Code** | **Item Description** | **ML1** | **ML3** | **ML2** |
| --- | --- | --- | --- | --- |
| BSBG14A | I care about the protection of plants and animals |  | 0.61 |  |
| BSBG14B | Nature exists to benefit humans regardless of the consequences |  |  | 0.67 |
| BSBG14C | The most important reason for protecting natural areas is so people can enjoy them |  |  | 0.74 |
| BSBG14D | I am confident that environmental problems will be solved by science and technology |  |  | 0.40 |
| BSBG14E | It makes me sad when nature is destroyed by humans |  | 0.67 |  |
| BSBG14F | I enjoy finding out what kinds of plants and animals live in my surrounding area |  | 0.51 |  |
| BSBG14G | I enjoy being in nature (e.g., forests, parks, deserts) |  | 0.58 |  |
| BSBG14H | Protecting nature is more important than economic growth |  | 0.58 |  |
| BSBG14I | Addressing climate change should be a high priority |  | 0.59 |  |
| BSBG15A | I try to reuse things (e.g., bags, bottles) | 0.37 |  |  |
| BSBG15B | I try to use fewer resources (e.g., water, food) | 0.48 |  |  |
| BSBG15C | I talk about how to help the environment | 0.80 |  |  |
| BSBG15D | I try to learn about environmental problems | 0.73 |  |  |
| BSBG15E | I try to participate in group activities to help the environment | 0.80 |  |  |
| BSBG15F | I tell my friends when they are doing things that harm the environment | 0.65 |  |  |

***Note.*** Factor loadings ≥ 0.20 are shown. *(n = 65,540)*

####

## 5-factor EFA

| **Item Code** | **Item Description** | **ML1** | **ML3** | **ML2** | **ML4** | **ML5** |
| --- | --- | --- | --- | --- | --- | --- |
| BSBG14A | I care about the protection of plants and animals | 0 | 0.524 | 0 | 0 | 0 |
| BSBG14B | Nature exists to benefit humans regardless of the consequences | 0 | 0 | 0.632 | 0 | 0 |
| BSBG14C | The most important reason for protecting natural areas is so people can enjoy them | 0 | 0 | 0.801 | 0 | 0 |
| BSBG14D | I am confident that environmental problems will be solved by science and technology | 0 | 0 | 0.412 | 0 | 0 |
| BSBG14E | It makes me sad when nature is destroyed by humans | 0 | 0.428 | 0 | 0.264 | 0 |
| BSBG14F | I enjoy finding out what kinds of plants and animals live in my surrounding area | 0 | 0.699 | 0 | 0 | 0 |
| BSBG14G | I enjoy being in nature (e.g., forests, parks, deserts) | 0 | 0.649 | 0 | 0 | 0 |
| BSBG14H | Protecting nature is more important than economic growth | 0 | 0.311 | 0 | 0.298 | 0 |
| BSBG14I | Addressing climate change should be a high priority | 0 | 0 | 0 | 0.755 | 0 |
| BSBG15A | I try to reuse things (e.g., bags, bottles) | 0 | 0 | 0 | 0 | 0.641 |
| BSBG15B | I try to use fewer resources (e.g., water, food) | 0.244 | 0 | 0 | 0 | 0.446 |
| BSBG15C | I talk about how to help the environment | 0.704 | 0 | 0 | 0 | 0 |
| BSBG15D | I try to learn about environmental problems | 0.697 | 0 | 0 | 0 | 0 |
| BSBG15E | I try to participate in group activities to help the environment | 0.806 | 0 | 0 | 0 | 0 |
| BSBG15F | I tell my friends when they are doing things that harm the environment | 0.619 | 0 | 0 | 0 | 0 |

***Note.*** Factor loadings ≥ 0.20 are shown. *(n = 65,540)*

#

# Appendix B

## Unstandardized Loadings of Three-Factor Preservation-Utilization-Behaviors CFA Models

*Unstandardized Factor Loadings for Three-Factor Configural Model of Cross-National Invariance (N = 79,306)*

| **Three-Factor Preservation-Utilization-Behaviors Model** | | | | | | | | |
| --- | --- | --- | --- | --- | --- | --- | --- | --- |
| Configural Invariance Model | | | | | | | | |
| Factor | Item | Loading | varwi | varbi | vartot | SE | 95% CI  lower | 95% CI  upper |
| **Preservation** | BSBG14A | 1 | 0 | 0 | 0 | 0 | 1 | 1 |
|  | BSBG14E | 1.251 | 0.012 | 0.041 | 0.053 | 0.23 | 0.801 | 1.702 |
|  | BSBG14F | 1.42 | 0.014 | 0.089 | 0.103 | 0.321 | 0.791 | 2.05 |
|  | BSBG14G | 1.114 | 0.013 | 0.088 | 0.101 | 0.318 | 0.491 | 1.737 |
|  | BSBG14H | 1.19 | 0.013 | 0.039 | 0.052 | 0.228 | 0.743 | 1.637 |
|  | BSBG14I | 1.006 | 0.012 | 0.028 | 0.041 | 0.202 | 0.61 | 1.402 |
| **Utilization** | BSBG14B | 1 | 0 | 0 | 0 | 0 | 1 | 1 |
|  | BSBG14C | 1.148 | 0.016 | 0.025 | 0.041 | 0.203 | 0.75 | 1.546 |
|  | BSBG14D | 0.7 | 0.006 | 0.061 | 0.067 | 0.26 | 0.191 | 1.209 |
| **Behaviors** | BSBG15A | 1 | 0 | 0 | 0 | 0 | 1 | 1 |
|  | BSBG15B | 1.15 | 0.01 | 0.011 | 0.021 | 0.144 | 0.867 | 1.433 |
|  | BSBG15C | 1.678 | 0.025 | 0.067 | 0.092 | 0.303 | 1.084 | 2.271 |
|  | BSBG15D | 1.664 | 0.028 | 0.062 | 0.09 | 0.3 | 1.075 | 2.252 |
|  | BSBG15E | 1.598 | 0.023 | 0.101 | 0.124 | 0.352 | 0.907 | 2.289 |
|  | BSBG15F | 1.528 | 0.02 | 0.039 | 0.06 | 0.244 | 1.049 | 2.007 |

***Note.*** Unstandardized factor loadings are pooled across 10 imputations using Rubin’s Rules. The variances reported include within-imputation variance (varwi), between-imputation variance (varbi), and total variance (vartot). Standard errors (SE) and 95% confidence intervals are based on the pooled total variance. All models were estimated with mean structures and equality constraints appropriate to the configural or metric model, as indicated.

##

##

## Unstandardized Loadings for Single-Factor Preservation, Utilization, and Behaviors CFA Models

*Unstandardized Factor Loadings for Single-Factor Configural Models of Cross-National Invariance (N = 79,306)*

| **Single-Factor Models** | | | | | | | | |
| --- | --- | --- | --- | --- | --- | --- | --- | --- |
| Configural Invariance Model | | | | | | | | |
| Factor | Item | Loading | varwi | varbi | vartot | SE | 95% CI  lower | 95% CI  upper |
| **Preservation** | BSBG14A | 1 | 0 | 0 | 0 | 0 | 1 | 1 |
|  | BSBG14E | 1.277 | 0 | 0 | 0 | 0.016 | 1.246 | 1.309 |
|  | BSBG14F | 1.331 | 0 | 0 | 0 | 0.016 | 1.299 | 1.362 |
|  | BSBG14G | 1.077 | 0 | 0 | 0 | 0.017 | 1.045 | 1.11 |
|  | BSBG14H | 1.17 | 0 | 0 | 0 | 0.016 | 1.139 | 1.201 |
|  | BSBG14I | 1.006 | 0 | 0 | 0 | 0.015 | 0.977 | 1.035 |
| **Utilization** | BSBG14B | 1 | 0 | 0 | 0 | 0 | 1 | 1 |
|  | BSBG14C | 1 | 0 | 0 | 0 | 0 | 1 | 1 |
|  | BSBG14D | 0.524 | 0 | 0 | 0 | 0.009 | 0.507 | 0.542 |
| **Behaviors** | BSBG15A | 1 | 0 | 0 | 0 | 0 | 1 | 1 |
|  | BSBG15B | 1.157 | 0.011 | 0.012 | 0.023 | 0.152 | 0.86 | 1.454 |
|  | BSBG15C | 1.708 | 0.026 | 0.066 | 0.092 | 0.304 | 1.113 | 2.303 |
|  | BSBG15D | 1.665 | 0.027 | 0.055 | 0.082 | 0.287 | 1.103 | 2.228 |
|  | BSBG15E | 1.634 | 0.025 | 0.095 | 0.121 | 0.348 | 0.952 | 2.317 |
|  | BSBG15F | 1.525 | 0.021 | 0.036 | 0.057 | 0.239 | 1.055 | 1.994 |

***Note.*** Unstandardized factor loadings are pooled across 10 imputations using Rubin’s Rules. The variances reported include within-imputation variance (varwi), between-imputation variance (varbi), and total variance (vartot). Standard errors (SE) and 95% confidence intervals are based on the pooled total variance. All models were estimated with mean structures and equality constraints appropriate to the configural or metric model, as indicated.

*Unstandardized Factor Loadings for Single-Factor Metric Models of Cross-National Invariance (N = 79,306)*

| **Single-Factor Models** | | | | | | | | |
| --- | --- | --- | --- | --- | --- | --- | --- | --- |
| Metric Invariance Model | | | | | | | | |
| Factor | Item | Loading | varwi | varbi | vartot | SE | 95% CI  lower | 95% CI  upper |
| **Preservation** | BSBG14A | 1 | 0 | 0 | 0 | 0 | 1 | 1 |
|  | BSBG14E | 1.27 | 0.015 | 0.037 | 0.052 | 0.229 | 0.821 | 1.718 |
|  | BSBG14F | 1.377 | 0.017 | 0.088 | 0.105 | 0.324 | 0.741 | 2.012 |
|  | BSBG14G | 1.129 | 0.017 | 0.09 | 0.107 | 0.326 | 0.489 | 1.769 |
|  | BSBG14H | 1.171 | 0.014 | 0.038 | 0.053 | 0.23 | 0.72 | 1.622 |
|  | BSBG14I | 1.007 | 0.015 | 0.027 | 0.042 | 0.205 | 0.606 | 1.409 |
| **Utilization** | BSBG14B | 1 | 0 | 0 | 0 | 0 | 1 | 1 |
|  | BSBG14C | 1 | 0 | 0 | 0 | 0 | 1 | 1 |
|  | BSBG14D | 0.587 | 0.005 | 0.033 | 0.038 | 0.195 | 0.204 | 0.97 |
| **Behaviors** | BSBG15A | 1 | 0 | 0 | 0 | 0 | 1 | 1 |
|  | BSBG15B | 1.159 | 0 | 0 | 0 | 0.014 | 1.132 | 1.186 |
|  | BSBG15C | 1.649 | 0 | 0 | 0 | 0.018 | 1.613 | 1.685 |
|  | BSBG15D | 1.614 | 0 | 0 | 0 | 0.019 | 1.578 | 1.651 |
|  | BSBG15E | 1.556 | 0 | 0 | 0 | 0.018 | 1.52 | 1.591 |
|  | BSBG15F | 1.489 | 0 | 0 | 0 | 0.018 | 1.454 | 1.524 |

***Note.*** Unstandardized factor loadings are pooled across 10 imputations using Rubin’s Rules. The variances reported include within-imputation variance (varwi), between-imputation variance (varbi), and total variance (vartot). Standard errors (SE) and 95% confidence intervals are based on the pooled total variance. All models were estimated with mean structures and equality constraints appropriate to the configural or metric model, as indicated.
